# Supplementary material
Source: PubMed Central journal article supplement (PMC2646883)
Supplement: bi800674a-File011.pdf [file bi800674a-File011.pdf]

# A KINETIC ALIGNMENT OF ORTHOLOGOUS IMP DEHYDROGENASES<sup>†</sup>

## SUPPLEMENTARY INFORMATION

Thomas V. Riera<sup>¶</sup>, Wen Wang<sup>¶</sup>, Helen R. Josephine<sup>¶</sup> and Lizbeth Hedstrom<sup>¶§\*</sup>

Departments of <sup>¶</sup>Biochemistry and <sup>§</sup>Chemistry, Brandeis University, Waltham, MA 02454 USA

**Figure S1. Equilibrium fluorescence in arbitrary fluorescence units (AFU) of *C. parvum* IMPDH versus varying IMP (A) or NAD<sup>+</sup> (B).** The fluorescence has been corrected for inner filter effects and nonspecific quenching as described in Materials and Methods. Binding reactions with IMP or NAD<sup>+</sup> were done with 0.12  $\mu$ M enzyme, 50 mM Tris-Cl, pH 8.0, 100 mM KCl, and 1 mM DTT at 25 °C.

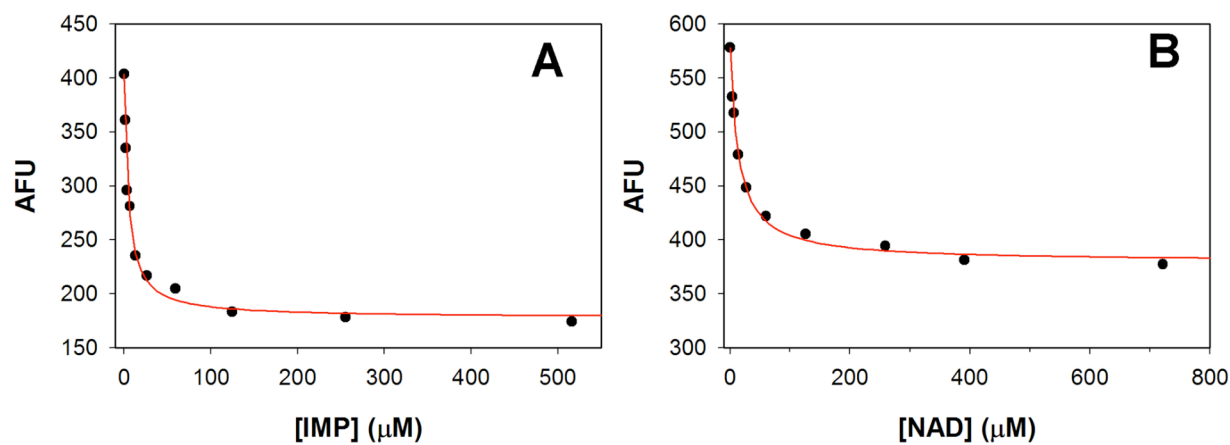

**Figure S2. Pre-steady-state reaction of *Cp*IMPDPH monitored by absorbance.** (A) Progress curve for the reaction of E•IMP with NAD<sup>+</sup> monitored by absorbance. Final concentrations after mixing are: 2.7 μM *Cp*IMPDPH, 500 μM IMP, 5 mM NAD<sup>+</sup>, 50 mM Tris-Cl, pH 8.0, 100 mM KCl, and 1 mM DTT . The data were fit by eq 6 (red curve). (B) The dependence of the value of  $k_{obs}$  versus NAD<sup>+</sup> concentration. These data were fit by eq 8 (red curve).

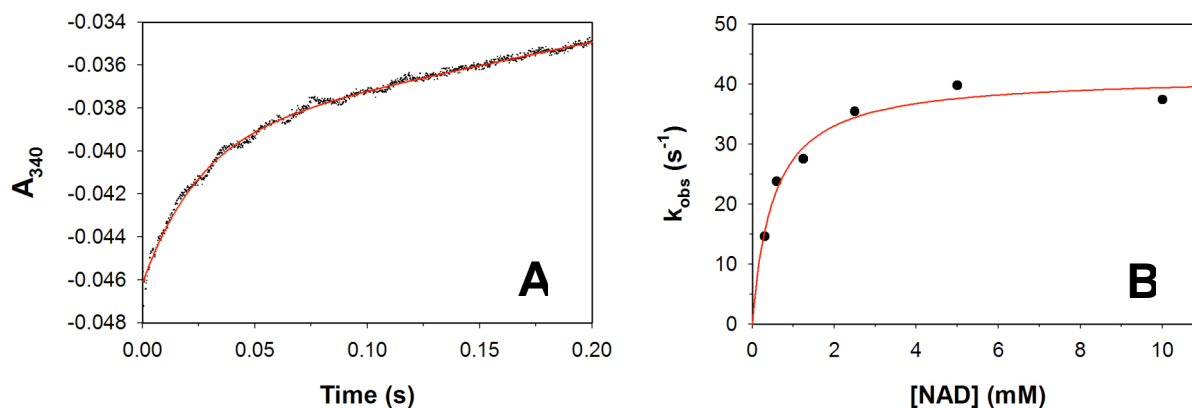

**Figure S3. Pre-steady-state reaction of *Cp*IMPDPH monitored by fluorescence.** (A) Progress curve for the reaction of E•IMP with NAD<sup>+</sup> monitored by fluorescence. Conditions as in Fig. S2A except 1 μM *Cp*IMPDPH. (B) The dependence of the value of  $k_{obs}$  versus NAD<sup>+</sup> concentration. These data were fit by eq 8 (red curve).

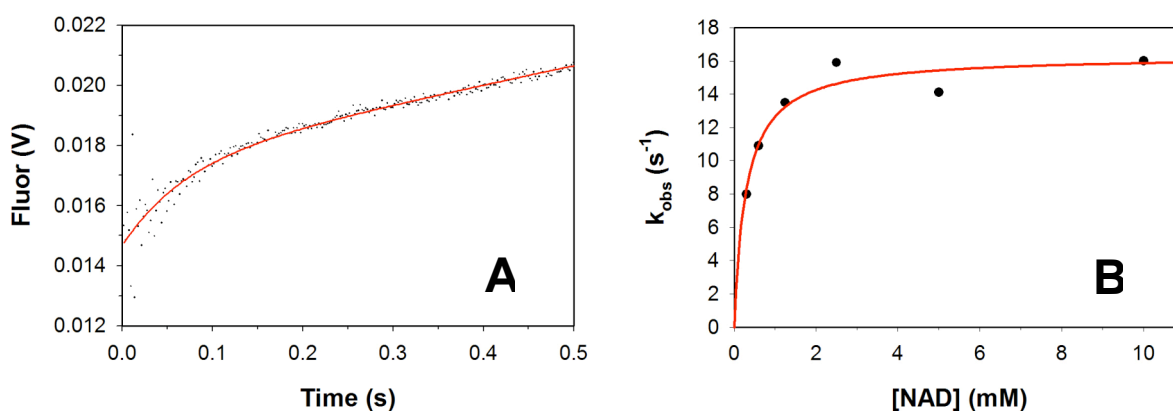

### Calculation of $k_{HOH}$ for the *Cp*IMPDH reaction

A solvent isotope effect on  $k_{cat}$ , steady-state accumulation of the E-XMP\* intermediate, and pre-steady-state bursts of NADH production and release all implicate hydrolysis as rate-limiting in *Cp*IMPDH. The rate of NADH release ( $k_9$ ) is only 6-fold faster than  $k_{cat}$  signifying that it is partially rate-limiting. As in the case of *Tf*IMPDH, NADH release and hydrolysis are irreversible allowing  $k_{cat}$  to be simplified to

$$k_{cat} = (k_9 k_{HOH^*}) / (k_9 + k_{HOH^*}) \quad (9)$$

where  $k_{HOH^*}$  is the observed rate of hydrolysis ( $I$ ). Hydrolysis of E-XMP\* requires the closed conformation of the flap, governed by  $K_c$ , allowing the intrinsic rate of hydrolysis ( $k_{HOH}$ ) to be calculated from  $k_{HOH^*}$  using eq 10.

$$k_{HOH} = k_{HOH^*} / (K_c / (1 + K_c)) \quad (10)$$

From eq 9 and 10,  $k_{HOH} = 3.9 \text{ s}^{-1}$ , indistinguishable from the rate for the *T. foetus* enzyme.

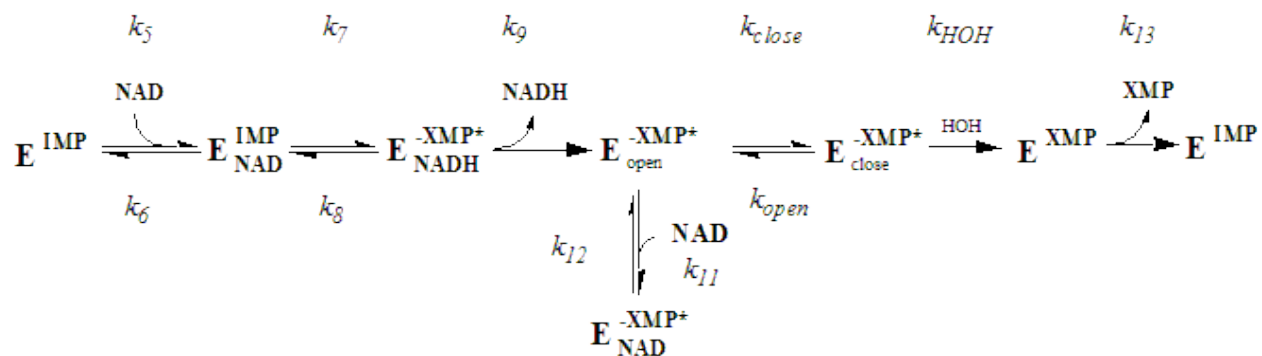

**Scheme S1. Kinetic scheme used for global fits of the *Cp*IMPDH reaction.**

### Global Fit Analysis of the *Cp*IMPDH reaction

The progress curves for the reaction of *Cp*IMPDH monitored by fluorescence and absorbance stopped-flow spectroscopy were globally fit using the program DynaFit (2). Signal

response factors for the fluorescence data were calculated by normalizing the linear steady-state regions of the fluorescence and absorbance data. Factors were calculated for each concentration of  $\text{NAD}^+$  to adjust for inner filter effects.

The experiment monitored the reaction of the pre-formed E•IMP complex with  $\text{NAD}^+$  at saturating IMP concentrations where the association of IMP is fast. Therefore, there are no experimental data to constrain the rate constants for the binding of IMP. The data were fit using the mechanism of Scheme S1. The value of  $k_{HOH}$  was fixed to  $3.9 \text{ s}^{-1}$  as calculated above and  $k_{I3}$  was set to  $200 \text{ s}^{-1}$  based on the XMP binding kinetics described in the text. Values of  $k_{close}$  and  $k_{open}$  were made arbitrarily fast such that the equilibrium constant  $K_c = 4$ , as determined by multiple inhibitor experiments (3). The fits are shown in Figure 3 and the values are listed in Table S1. These data do not contain adequate constraints on the rates of  $\text{NAD}^+$  binding to E-XMP\*. Therefore, these values are not well-determined and only estimates are provided. However, the value of  $k_{I2}/k_{I1}$  was consistently determined to be 200-400  $\mu\text{M}$ .

Two features arise from the fit results for  $\text{NAD}^+$  binding to E•IMP. First, binding is essentially irreversible. The best fit value of  $k_6$  is  $\sim 0 \text{ s}^{-1}$  and values of  $k_6$  greater than  $0.1 \text{ s}^{-1}$  result in poor fits to the data. Therefore,  $k_6 \leq 0.1 \text{ s}^{-1}$ . Second, the value of  $k_5$  is comparable to  $k_{cat}/K_M$  for  $\text{NAD}^+$ . Together, these observations indicate that  $\text{NAD}^+$  is a sticky substrate, whereby the E•IMP• $\text{NAD}^+$  complex reacts before it dissociates. Therefore, the value of  $K_d \leq 2.3 \mu\text{M}$  for  $\text{NAD}^+$  binding to the E•IMP binary complex, which is at least 6x higher than the affinity of  $\text{NAD}^+$  for free enzyme.

Based on Scheme S1, expressions for  $k_{cat}$  (eq 11) and  $K_{M\text{NAD}^+}$  (eq 12) were derived using the King-Altman method (4).

$$k_{cat} = (k_7 k_9 k_{close} k_{HOH} k_{I3}) / A \quad (11)$$

$$K_{M NAD^+} = [(k_{close} k_{HOH} k_{13})(k_6 k_8 + k_6 k_9 + k_7 k_9)] / (k_5 A) \quad (12)$$

$$A = (k_8 k_{close} k_{HOH} k_{13} + k_9 k_{close} k_{HOH} k_{13} + k_7 k_{close} k_{HOH} k_{13} + k_7 k_9 k_{open} k_{13} + k_7 k_9 k_{HOH} k_{13} + k_7 k_9 k_{close} k_{13} + k_7 k_9 k_{close} k_{HOH}) \quad (13)$$

Using the values from Table S1 for *Cp*IMPDPH,  $k_{cat} = 1.8 \text{ s}^{-1}$  and  $K_{M NAD^+} = 40 \text{ }\mu\text{M}$  were calculated from eq 11 and 12 respectively.

**Table S1. Values of the rate constants from Scheme S1 and S2 for CpIMPDH and hIMPDH2 respectively.<sup>a</sup>**

| rate constant               | CpIMPDH                     | hIMPDH2            |
|-----------------------------|-----------------------------|--------------------|
| $k_5$ ( $M^{-1}s^{-1}$ )    | $(4.4 \pm 0.1) \times 10^4$ | $1 \times 10^{6b}$ |
| $k_6$ ( $s^{-1}$ )          | $\leq 0.1^c$                | $80 \pm 1$         |
| $k_7$ ( $s^{-1}$ )          | $44 \pm 3$                  | $12 \pm 0.4$       |
| $k_8$ ( $s^{-1}$ )          | $87 \pm 6$                  | $7.4 \pm 0.6$      |
| $k_9$ ( $s^{-1}$ )          | $14 \pm 1$                  | $12 \pm 0.3^d$     |
| $k_{11}$ ( $M^{-1}s^{-1}$ ) | $\sim 4 \times 10^{6e}$     | $1 \times 10^{6f}$ |
| $k_{12}$ ( $s^{-1}$ )       | $\sim 800^e$                | $590^f$            |
| $k_{12}/k_{11}$ ( $\mu M$ ) | $200-400^e$                 | $590^f$            |
| $k_{close}$ ( $s^{-1}$ )    | $400^f$                     | nd <sup>g</sup>    |
| $k_{open}$ ( $s^{-1}$ )     | $100^f$                     | nd <sup>g</sup>    |
| $k_{conf}$ ( $s^{-1}$ )     | na <sup>h</sup>             | $1.0 \pm 0.1$      |
| $k_{HOH}$ ( $s^{-1}$ )      | $3.9^f$                     | $1^f$              |
| $k_{13}$ ( $s^{-1}$ )       | $200^f$                     | nd <sup>g</sup>    |

<sup>a</sup> Values from the global fits of the absorbance and fluorescence stopped-flow data using the program DynaFit. <sup>b</sup> The slowest value which fits the data. Faster values also work well. <sup>c</sup> Estimated upper limit due to the high commitment to catalysis as described in the text. <sup>d</sup>  $k_{burst}$  from the local fit analysis. <sup>e</sup> Approximate values. The individual rates are not well determined; however, the ratio  $k_{12}/k_{11}$  was consistently 200-400  $\mu M$ . <sup>f</sup> Fixed value used for fitting as described in the text. <sup>g</sup> not determined. <sup>h</sup> not applicable.

**Figure S4. Pre-steady-state reaction for hIMPDH2.** Enzyme and saturating IMP were combined with  $\text{NAD}^+$  at time 0 in 50 mM Tris-Cl, pH 8.0, 100 mM KCl, and 1 mM DTT at 25 °C. (A) Final concentrations after mixing are 4  $\mu\text{M}$  enzyme, 2 mM IMP, and 200  $\mu\text{M}$   $\text{NAD}^+$ . The fluorescence time course displays two exponential phases followed by a linear steady-state. These data were fit by eq 7 (red curve). (B) Final concentrations after mixing are 3.5  $\mu\text{M}$  enzyme, 2 mM IMP, and 400  $\mu\text{M}$   $\text{NAD}^+$ . The absorbance time course displays a single exponential phase followed by a linear steady-state. These data were fit by eq 6 (red curve).

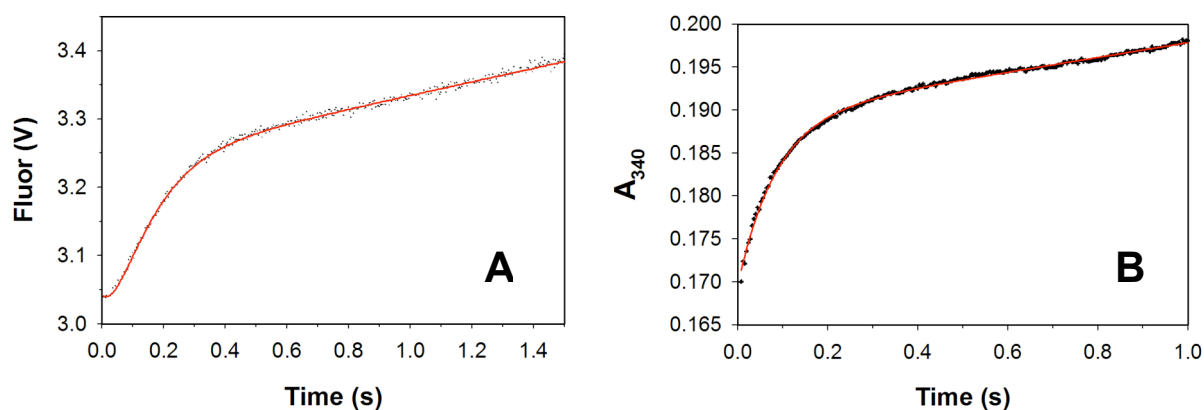

**Table S2. The pre-steady state reaction of hIMPDH2 monitored by absorbance.**

| Enzyme ( $\mu\text{M}$ ) | $\text{NAD}^+$ $\mu\text{M}$ | $k_{obs}$ ( $\text{s}^{-1}$ ) |
|--------------------------|------------------------------|-------------------------------|
| 1.0                      | 400                          | $14 \pm 1$                    |
| 1.8                      | 400                          | $13 \pm 1$                    |
| 3.5                      | 400                          | $12 \pm 1$                    |
| 3.5                      | 1000                         | $15 \pm 1$                    |

### ***Global Fit Analysis of the hIMPDH2 reaction***

The pre-steady-state reaction of  $\text{E}\cdot\text{IMP}$  with  $\text{NAD}^+$  for hIMPDH2 was also examined by DynaFit. The mechanism of Scheme S2 was used for fitting. The concentration of IMP used in

these experiments is 2 mM, so IMP binding was modeled as saturated. In the absence of information about the flap equilibrium, we have modeled this step as irreversible for simplicity. Due to its low affinity binding to enzyme, XMP release was modeled as simultaneous with hydrolysis. To account for NAD<sup>+</sup> substrate inhibition, the values of  $k_{11}$  and  $k_{12}$  were set arbitrarily fast such that  $k_{12}/k_{11} = K_{ii} = 590 \mu\text{M}$  (5). The global fits supported the assignment of  $k_{burst}$  to NADH release, so  $k_9$  was fixed to  $12 \text{ s}^{-1}$  from the local fit analysis. The value of  $k_5$  was fixed to  $1 \times 10^6 \text{ M}^{-1}\text{s}^{-1}$ . Slower values resulted in poor fits while faster rates worked equally well. Fixing these values served to further constrain the remaining parameters. The values of the rate constants are listed in Table S2 and the resulting fits are shown in Figure 4.

The value of  $k_{HOH}$  was calculated from the values of  $k_{cat}$  and the solvent isotope effect as follows. The fractional contribution of  $k_{HOH}$  to  $k_{cat}$  ( $f$ ) is given by

$$f = ({}^{D2O}k_{cat} - 1) / ({}^{D2O}k_{HOH} - 1) \quad (14)$$

where  ${}^{D2O}k_{cat}$  is the solvent isotope effect on  $k_{cat}$  and  ${}^{D2O}k_{HOH}$  is the intrinsic isotope effect on hydrolysis, allowing  $k_{HOH}$  to be calculated from eq 15.

$$k_{HOH} = k_{cat}/f \quad (15)$$

Assuming the intrinsic isotope effect is 3, as observed in the reaction of *Cp*IMPDPH as well as in the reaction of serine proteases (6), then  $f = 0.4$ ,  $k_{HOH} = 1 \text{ s}^{-1}$  and  $k = 0.7 \text{ s}^{-1}$  for the other rate-limiting step (7). From this analysis, the value of  $k_{HOH}$  was fixed to  $1 \text{ s}^{-1}$  for global fitting resulting in a fitted value for  $k_{close}$  of  $1 \text{ s}^{-1}$ . Thus, both the solvent isotope effect and stopped-flow experiments support an additional rate-limiting step.

Consistent with the local fit analysis, the hydride transfer step is similar in rate to NADH release. The calculated value of  $K_H$  for this step is 1.6. From these fits, NAD<sup>+</sup> binding to the E•IMP complex has a  $K_d = 80 \mu\text{M}$ . Substantial isotope effects have been observed on  $V/K$



(NAD<sup>+</sup>) indicating that NAD<sup>+</sup> is not a sticky substrate for the hIMPDPH2 (5, 8). This predicts that the value of  $k_6 \geq k_7 = 12 \text{ s}^{-1}$ . This prediction is fulfilled by the fits.

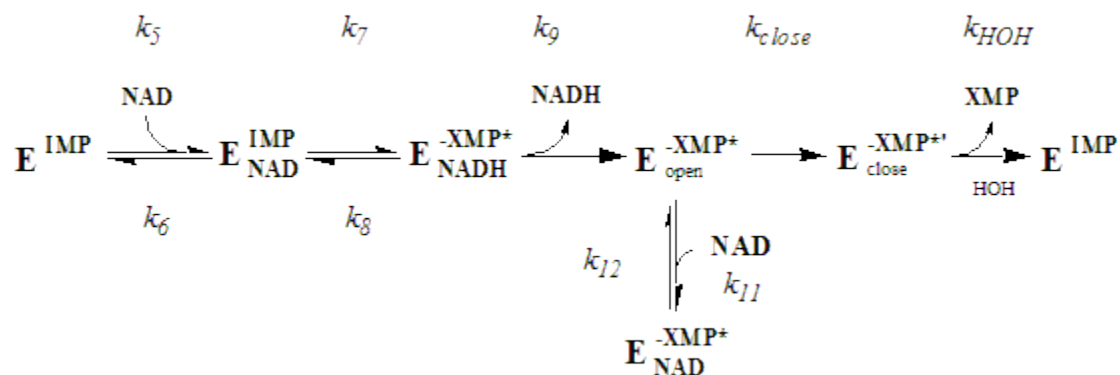

**Scheme S2. Kinetic scheme used for global fits of the hIMPDPH2 reaction by DynaFit.**

## REFERENCES

- (1) Guillén Schlippe, Y. V., Riera, T. V., Seyedsayamdost, M. R., and Hedstrom, L. (2004) Substitution of the Conserved Arg-Tyr Dyad Selectively Disrupts the Hydrolysis Phase of the IMP Dehydrogenase Reaction. *Biochemistry* 43, 4511-21.
- (2) Kuzmic, P. (1996) Program DYNAFIT for the analysis of enzyme kinetic data: application to HIV proteinase. *Anal Biochem* 237, 260-73.
- (3) Umejiego, N. N., Li, C., Riera, T., Hedstrom, L., and Striepen, B. (2004) *Cryptosporidium parvum* IMP dehydrogenase: identification of functional, structural, and dynamic properties that can be exploited for drug design. *J Biol Chem* 279, 40320-7.
- (4) King, and Altman. (1956) *J. Phys. Chem.* 60, 1375.
- (5) Wang, W., and Hedstrom, L. (1997) Kinetic mechanism of human inosine 5'-monophosphate dehydrogenase type II: random addition of substrates and ordered release of products. *Biochemistry* 36, 8479-83.
- (6) Hedstrom, L. (2002) Serine protease mechanism and specificity. *Chem Rev* 102, 4501-24.
- (7) Northrop, D. B. (1975) Steady-state analysis of kinetic isotope effects in enzymic reactions. *Biochemistry* 14, 2644-51.
- (8) Xiang, B., and Markham, G. D. (1997) Probing the mechanism of inosine monophosphate dehydrogenase with kinetic isotope effects and NMR determination of the hydride transfer stereospecificity. *Arch Biochem Biophys* 348, 378-82.
